# Supplementary material
Source: MDPI journal article supplement (https://www.mdpi.com/2071-1050/10/6/1969)
Supplement: s1 [file s1]

Archive with 2 entries (2 files):
- Westerbergh et al_FigureS1.pdf
- Westerbergh et al_TableS1.pdf
