# Supplementary material
Source: MDPI journal article supplement (https://www.mdpi.com/2071-1050/10/6/1969)
Supplement: s1 [file s1 › Westerbergh et al_FigureS1.pdf]

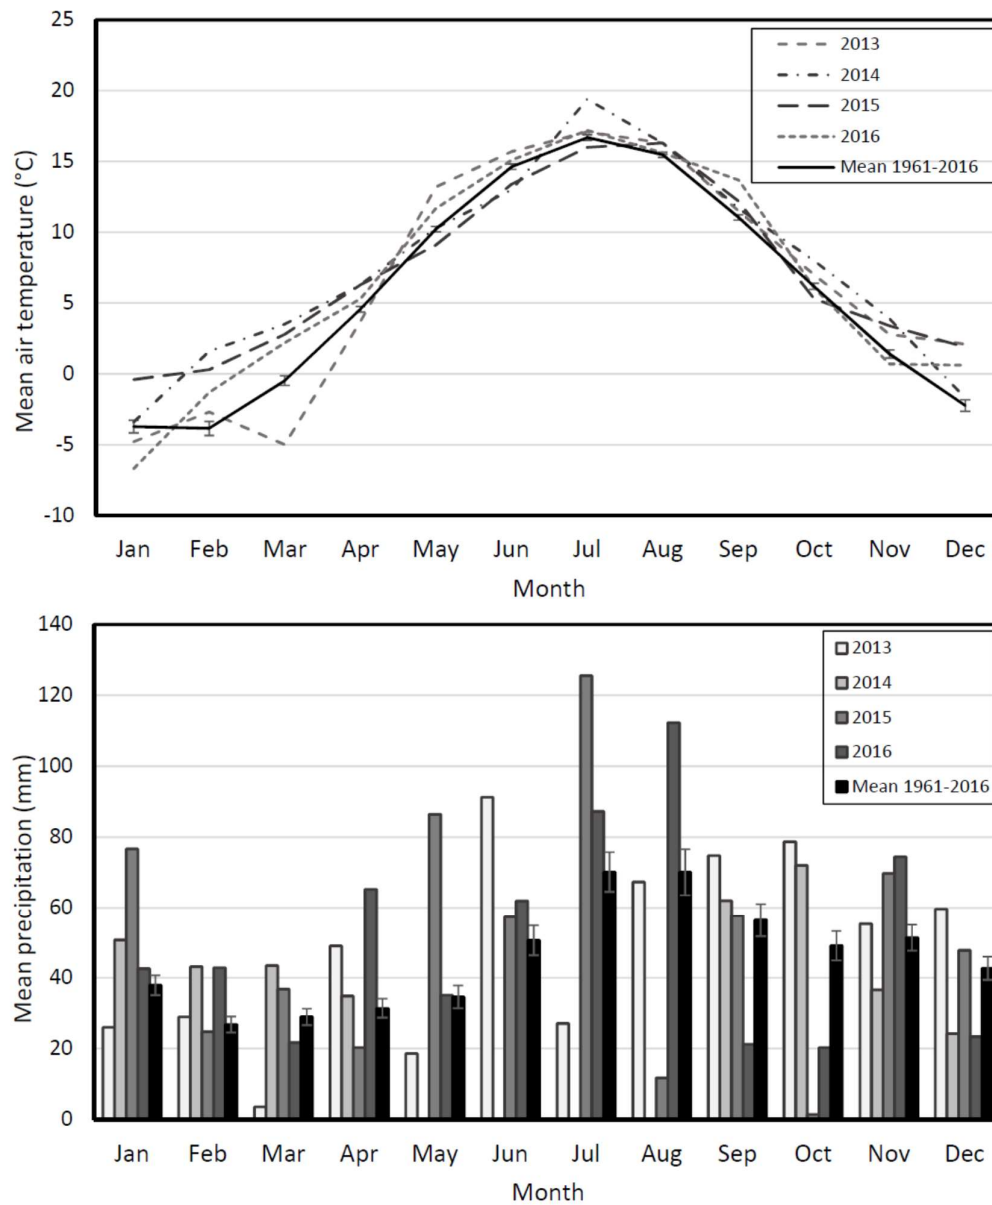

**Figure S1.** Monthly mean temperatures and precipitations at the field site in Uppsala, Sweden (latitude 60°N). Data for the years of the field trial and the averages during 1961-2016 are shown. Compiled from monthly averages available from the Swedish Meteorological and Hydrological Institute. Location for weather data collection was the Uppsala airport at 10 km distance from the field site.
