# Supplementary material
Source: MDPI journal article supplement (https://www.mdpi.com/2071-1050/10/6/1969)
Supplement: s1 [file s1 › Westerbergh et al_TableS1.pdf]

**Table S1.** Species and accessions included in comparison of regrowth of wild *Hordeum* species in cold temperate climate.

Accession numbers and origin according to information from the seed providers Nordic Genetic Resource Centre (NordGen), Alnarp, Sweden;

Leibniz-Institut Für Pflanzengenetik und Kulturpflanzenforschung (IPK), Gatersleben, Germany;

National Germplasm Resources Laboratory, United States Department of Agriculture (USDA), Beltsville, MD, USA; and Lantmännen SW Seed AB, Svalöv, Sweden.

| Accession ID-SLU | Genus          | Species               | Accession number | Accession name | Genebank/Provider of seeds | Origin         | Latitude   | Longitude  |
|------------------|----------------|-----------------------|------------------|----------------|----------------------------|----------------|------------|------------|
| 1                | <i>Hordeum</i> | <i>bogdanii</i>       | H240             | H240           | NordGen                    | Afghanistan    | 33°00'N    | 69°12'E    |
| 2                | <i>Hordeum</i> | <i>brachyantherum</i> | NGB6445.1        | H1969          | NordGen                    | USA            | 37°24'N    | 120°00'W   |
| 3                | <i>Hordeum</i> | <i>brachyantherum</i> | NGB90333.2       | H2318          | NordGen                    | USA            | 35°12'N    | 111°42'W   |
| 4                | <i>Hordeum</i> | <i>brevisubulatum</i> | PI 229449        | 15513          | USDA                       | Iran           | 38°25'59"N | 47°58'59"E |
| 5                | <i>Hordeum</i> | <i>bulbosum</i>       | PI 420909        | 33             | USDA                       | Jordan         | 30°40'0"N  | 35°37'59"E |
| 6                | <i>Hordeum</i> | <i>bulbosum</i>       | PI 219869        | 73             | USDA                       | Iraq           | 36°24'0"N  | 44°12'0"E  |
| 7                | <i>Hordeum</i> | <i>bulbosum</i>       | PI 204581        | 146            | USDA                       | Turkey         | 39°34'59"N | 35°19'59"E |
| 8                | <i>Hordeum</i> | <i>bulbosum</i>       | PI 168306        | 2829           | USDA                       | Turkey         | 40°51'20"N | 26°37'49"E |
| 9                | <i>Hordeum</i> | <i>bulbosum</i>       | NGB9213.1        | 9213,1         | NordGen                    | NA             | NA         | NA         |
| 10               | <i>Hordeum</i> | <i>bulbosum</i>       | PI 229694        | 15318          | USDA                       | Iran           | 35°16'59"N | 47°9'0"E   |
| 11               | <i>Hordeum</i> | <i>bulbosum</i>       | PI 249748        | 17030          | USDA                       | Greece         | 38°18'0"N  | 23°16'59"E |
| 12               | <i>Hordeum</i> | <i>bulbosum</i>       | PI 531777        | 531777         | USDA                       | Tajikistan     | 38°0'0"N   | 68°30'0"E  |
| 13               | <i>Hordeum</i> | <i>bulbosum</i>       | PI 247050        | B-144          | USDA                       | Germany        | NA         | NA         |
| 14               | <i>Hordeum</i> | <i>bulbosum</i>       | GRA 1171         | GRA 1171       | IPK                        | Uzbekistan     | NA         | NA         |
| 15               | <i>Hordeum</i> | <i>bulbosum</i>       | GRA 1198         | GRA 1198       | IPK                        | Tajikistan     | NA         | NA         |
| 16               | <i>Hordeum</i> | <i>bulbosum</i>       | GRA 584          | GRA 584        | IPK                        | NA             | NA         | NA         |
| 17               | <i>Hordeum</i> | <i>bulbosum</i>       | GRA 655          | GRA 655        | IPK                        | Soviet union   | NA         | NA         |
| 18               | <i>Hordeum</i> | <i>bulbosum</i>       | GRA 905          | GRA 905        | IPK                        | Uzbekistan     | NA         | NA         |
| 19               | <i>Hordeum</i> | <i>bulbosum</i>       | GRA 945          | GRA 945        | IPK                        | Israel         | NA         | NA         |
| 20               | <i>Hordeum</i> | <i>bulbosum</i>       | GRA 948          | GRA 948        | IPK                        | Australia      | NA         | NA         |
| 21               | <i>Hordeum</i> | <i>bulbosum</i>       | GRA 970          | GRA 970        | IPK                        | Greece         | NA         | NA         |
| 22               | <i>Hordeum</i> | <i>bulbosum</i>       | NGB18419.1       | H10298         | NordGen                    | Tajikistan     | NA         | NA         |
| 23               | <i>Hordeum</i> | <i>bulbosum</i>       | NGB9214          | J 1013         | NordGen                    | NA             | NA         | NA         |
| 24               | <i>Hordeum</i> | <i>bulbosum</i>       | PI 639320        | TJK03-24       | USDA                       | Tajikistan     | 38°47'27"N | 70°17'3"E  |
| 25               | <i>Hordeum</i> | <i>bulbosum</i>       | PI 614642        | UKR-99-010     | USDA                       | Ukraine/Crimea | 44°30'38"N | 34°13'59"E |
| 26               | <i>Hordeum</i> | <i>bulbosum</i>       | PI 614643        | UKR-99-028     | USDA                       | Ukraine/Crimea | 44°24'39"N | 34°0'15"E  |
| 27               | <i>Hordeum</i> | <i>bulbosum</i>       | PI 614645        | UKR-99-163     | USDA                       | Ukraine/Crimea | 44°47'31"N | 34°37'23"E |
| 28               | <i>Hordeum</i> | <i>bulbosum</i>       | PI 211048        | 12916          | USDA                       | Afghanistan    | 35°52'59"N | 64°40'59"E |
| 29               | <i>Hordeum</i> | <i>bulbosum</i>       | GRA 1033         | GRA 1033       | IPK                        | Italy          | NA         | NA         |
| 30               | <i>Hordeum</i> | <i>bulbosum</i>       | GRA 1154         | GRA 1154       | IPK                        | Italy          | NA         | NA         |
| 31               | <i>Hordeum</i> | <i>bulbosum</i>       | GRA 944          | GRA 944        | IPK                        | Netherlands    | NA         | NA         |
| 32               | <i>Hordeum</i> | <i>bulbosum</i>       | GRA 958          | GRA 958        | IPK                        | Armenia        | NA         | NA         |
| 33               | <i>Hordeum</i> | <i>bulbosum</i>       | PI 614644        | UKR-99-085     | USDA                       | Ukraine/Crimea | 44°30'56"N | 33°33'24"E |
| 34               | <i>Hordeum</i> | <i>capense</i>        | NGB14362.2       | H3923          | NordGen                    | South Africa   | 34°06'S    | 019°36'E   |
| 35               | <i>Hordeum</i> | <i>chilense</i>       | 531781           | D-2739         | USDA                       | Argentina      | 41°22'0"S  | 71°43'0"W  |
| 36               | <i>Hordeum</i> | <i>chilense</i>       | NGB 90119.2      | H1819          | NordGen                    | Chile          | 30°00'S    | 071°18'W   |
| 37               | <i>Hordeum</i> | <i>chilense</i>       | NGB 90054.4      | H1816          | NordGen                    | Chile          | 30°00'S    | 071°18'W   |
| 38               | <i>Hordeum</i> | <i>comosum</i>        | H10608           | H10608         | NordGen                    | Argentina      | NA         | NA         |
| 39               | <i>Hordeum</i> | <i>cordobense</i>     | H1702            | H1702          | NordGen                    | Argentina      | 31°18'S    | 064°12'W   |
| 40               | <i>Hordeum</i> | <i>depressum</i>      | GRA 975          | GRA 975        | IPK                        | USA            | NA         | NA         |
| 41               | <i>Hordeum</i> | <i>erectifolium</i>   | BCC2026/H1150    | BCC2026/H1150  | IPK                        | Argentina      | 38°30'S    | 062°18'W   |
| 42               | <i>Hordeum</i> | <i>euclaston</i>      | NGB90121         | H6036          | NordGen                    | Argentina      | 40°48'S    | 064°06'W   |
| 43               | <i>Hordeum</i> | <i>euclaston</i>      | NGB90233         | H2148          | NordGen                    | Uruguay        | 32°12'S    | 057°54'W   |
| 44               | <i>Hordeum</i> | <i>fuegianum</i>      | NGB15680.1       | H6156          | NordGen                    | Argentina      | 53°48'S    | 067°42'W   |
| 45               | <i>Hordeum</i> | <i>intercedens</i>    | NGB6474          | H1940          | NordGen                    | USA            | 34°00'N    | 117°24'W   |
| 46               | <i>Hordeum</i> | <i>intercedens</i>    | NGB6475.2        | H1941          | NordGen                    | USA            | 42°12'N    | 120°18'W   |
| 47               | <i>Hordeum</i> | <i>intercedens</i>    | NGB15676         | H3252          | NordGen                    | Mexico         | 30°24'N    | 115°54'W   |
| 48               | <i>Hordeum</i> | <i>jubatum</i>        | NGB6819.2        | H4159          | NordGen                    | China          | NA         | NA         |
| 49               | <i>Hordeum</i> | <i>jubatum</i>        | NGB8541.2        | H1162          | NordGen                    | Argentina      | 34°30'S    | 058°18'W   |
| 50               | <i>Hordeum</i> | <i>lechleri</i>       | NGB8544.1        | H6104          | NordGen                    | Argentina      | 54°00'S    | 069°00'W   |
| 51               | <i>Hordeum</i> | <i>muticum</i>        | H6479            | H6479          | NordGen                    | Argentina      | 24°12'S    | 065°24'W   |
| 52               | <i>Hordeum</i> | <i>muticum</i>        | 531785           | 495            | USDA                       | Bolivia        | NA         | NA         |
| 53               | <i>Hordeum</i> | <i>patagonicum</i>    | H6249            | H6249          | NordGen                    | Argentina      | 41°54'S    | 066°00'W   |
| 54               | <i>Hordeum</i> | <i>pubiflorum</i>     | H1379            | H1379          | NordGen                    | Chile          | 52°30'S    | 075°00'W   |
| 55               | <i>Hordeum</i> | <i>pusillum</i>       | NGB6585          | H722           | NordGen                    | USA            | 34°42'N    | 100°24'W   |
| 56               | <i>Hordeum</i> | <i>pusillum</i>       | NGB6888          | H1906          | NordGen                    | USA            | 39°48'N    | 105°12'W   |
| 57               | <i>Hordeum</i> | <i>pusillum</i>       | NGB90603.2       | H3881          | NordGen                    | USA            | 40°24'N    | 078°12'W   |
| 58               | <i>Hordeum</i> | <i>secalinum</i>      | NGB6589.2        | H231           | NordGen                    | Sweden         | 55°54'N    | 012°48'E   |
| 59               | <i>Hordeum</i> | <i>stenostachys</i>   | NGB90151.2       | H1780          | NordGen                    | Argentina      | 31°30'S    | 068°30'W   |
| 60               | <i>Hordeum</i> | <i>stenostachys</i>   | NGB90395.3       | H6398          | NordGen                    | Argentina      | 33°42'S    | 065°18'W   |
| 61               | <i>Hordeum</i> | <i>stenostachys</i>   | NGB90398         | H6436          | NordGen                    | Argentina      | 29°24'S    | 068°42'W   |
| 62               | <i>Hordeum</i> | <i>stenostachys</i>   | BCC2021          | BCC2021/H1108  | IPK                        | Argentina      | 34°30'S    | 058°18'W   |
| 63               | <i>Hordeum</i> | <i>stenostachys</i>   | NGB90069.2       | H6038          | NordGen                    | Argentina      | 41°24'S    | 065°00'W   |
| 64               | <i>Hordeum</i> | <i>stenostachys</i>   | NGB90071         | H6438          | NordGen                    | Argentina      | 28°30'S    | 065°48'W   |
| 65               | <i>Hordeum</i> | <i>stenostachys</i>   | NGB90072.2       | H6484          | NordGen                    | Argentina      | 31°54'S    | 060°36'W   |
| 66               | <i>Hordeum</i> | <i>stenostachys</i>   | NGB90152         | H1783          | NordGen                    | Argentina      | 29°24'S    | 068°42'W   |
| 67               | <i>Hordeum</i> | <i>stenostachys</i>   | NGB90393.2       | H1149          | NordGen                    | Argentina      | 38°30'S    | 062°18'W   |
| 68               | <i>Hordeum</i> | <i>vulgare</i>        |                  | cv Talisman    | Lantmännen SW Seed AB      | Europe         |            |            |
| 69               | <i>Hordeum</i> | <i>vulgare</i>        |                  | cv Anisette    | Lantmännen SW Seed AB      | Europe         |            |            |
| 70               | <i>Hordeum</i> | <i>vulgare</i>        |                  | cv Matros      | Lantmännen SW Seed AB      | Europe         |            |            |
